# Supplementary material for: Medicare Transitional Care Management Program and Changes in Timely Postdischarge Follow-Up
Source: PubMed Central journal article supplement (PMC11065163; doi:10.1001/jamahealthforum.2024.0417), 2024-04-12
Supplement: jamahealthforum-e240417-s001.pdf [file jamahealthforum-e240417-s001.pdf]

## Supplemental Online Content

Anderson TS, Herzig SJ, Marcantonio ER, Yeh RW, Souza J, Landon BE. Medicare Transitional Care Management Program and Changes in Timely Postdischarge Follow-Up. *JAMA Health Forum*. Published online April 12, 2024.  
doi:10.1001/jamahealthforum.2024.0417

**eTable 1.** Ambulatory Visit Codes

**eTable 2.** Interrupted Time Series Estimates of the Association between Transitional Care Management and 30-Day Post-Discharge Follow Up

**eTable 3.** Interrupted Time Series Estimates of the Association between Transitional Care Management and 30-Day Post-Discharge Follow Up, by Demographics

**eFigure 1.** Trends in 30-Day Post-Discharge Follow Up, 2010-2019

**eFigure 2.** Rates of Transitional Care Management Visits in 2019, by Demographics

**eFigure 3.** Trends in Timely Post-Discharge Follow Up, 2010-2019, by ACO Attribution

**eFigure 4.** Trends in Timely Post-Discharge Follow Up, 2010-2019, by Recent Primary Care

This supplemental material has been provided by the authors to give readers additional information about their work.

**eTable 1:** Ambulatory Visit Codes

| <b>Visit Type</b>                                           | <b>CPT Codes</b> |
|-------------------------------------------------------------|------------------|
| Transitional Care Management (TCM) Visit                    | 99495 – 99496    |
| <b>Non-TCM Ambulatory Visits</b>                            |                  |
| Office or Other Outpatient Visit for an Established Patient | 99211 – 99215    |
| New Patient Office Visit                                    | 99201 – 99205    |
| Annual Wellness Visit                                       | G0438, G0439     |

**eTable 2:** Interrupted Time Series Estimates of the Association between Transitional Care Management and 30-Day Post-Discharge Follow Up

| <b>30-Day Follow Up</b>      | <b>Outcome in 2010, %</b> | <b>Outcome in 2019, %</b> | <b>Absolute Change, %</b> | <b>Pre-TCM Slope, quarterly % change (95% CI)</b> | <b>Post-TCM Slope, quarterly % change (95% CI)</b> | <b>Absolute Change in Slope, quarterly % change (95% CI)</b> |
|------------------------------|---------------------------|---------------------------|---------------------------|---------------------------------------------------|----------------------------------------------------|--------------------------------------------------------------|
| Primary Care                 |                           |                           |                           |                                                   |                                                    |                                                              |
| Timely Follow Up             | 45.0                      | 52.2                      | 7.2                       | 0.11 (0.05 – 0.17)*                               | 0.23 (0.19 – 0.26)*                                | 0.12 (0.05 – 0.19)*                                          |
| Transitional Care Management | 0                         | 13.2                      | 13.2                      | -                                                 | -                                                  | -                                                            |
| Office Visit                 | 45.0                      | 39.0                      | -6.0                      | 0.11 (0.05 – 0.17)*                               | -0.22 (-0.25 – -0.19)*                             | -0.33 (-0.40 – -0.26)*                                       |
| Specialist                   | 44.3                      | 48.3                      | 4.0                       | 0.07 (0.02 - 0.13)*                               | 0.07 (0.02 - 0.12)*                                | -0.004 (-0.08 - 0.07)                                        |
| Primary Care or Specialist   | 66.2                      | 71.3                      | 5.1                       | 0.07 (0.004 - 0.13)*                              | 0.14 (0.10 - 0.18)*                                | 0.07 (-0.001 - 0.15)                                         |

**eTable 3:** Interrupted Time Series Estimates of the Association between Transitional Care Management and 30-Day Post-Discharge Follow Up, by Demographics

|                                 | 30-Day Primary Care Follow Up |         | Absolute Change, % | Pre-TCM Slope, quarterly % change (95% CI) | Post-TCM Slope, quarterly % change (95% CI) | Absolute Change in Slope, quarterly % change (95% CI) | Difference in Slope Change, quarterly % change (95% CI) |
|---------------------------------|-------------------------------|---------|--------------------|--------------------------------------------|---------------------------------------------|-------------------------------------------------------|---------------------------------------------------------|
|                                 | 2010, %                       | 2019, % |                    |                                            |                                             |                                                       |                                                         |
| <b>Sex</b>                      |                               |         |                    |                                            |                                             |                                                       |                                                         |
| Female                          | 31.8                          | 39.0    | 7.2                | 0.11 (0.05 - 0.18)*                        | 0.23 (0.19 - 0.26) *                        | 0.12 (0.04 - 0.19) *                                  | -0.003 (-0.10 - 0.09)                                   |
| Male                            | 31.0                          | 38.6    | 7.5                | 0.11 (0.06 - 0.16) *                       | 0.23 (0.19 - 0.26) *                        | 0.12 (0.06 - 0.18) *                                  | Reference                                               |
| <b>Race/Ethnicity</b>           |                               |         |                    |                                            |                                             |                                                       |                                                         |
| Asian                           | 32.8                          | 37.9    | 5.1                | 0.17 (0.10 - 0.24) *                       | 0.14 (0.11 - 0.17) *                        | -0.02 (-0.09 - 0.04)                                  | -0.09 (-0.60 - 0.42)                                    |
| Black                           | 25.6                          | 31.4    | 5.8                | 0.13 (0.07 - 0.19) *                       | 0.16 (0.13 - 0.19) *                        | 0.03 (-0.04 - 0.10)                                   | -0.10 (-0.20 - -0.004) *                                |
| Hispanic                        | 30.7                          | 35.4    | 4.7                | 0.10 (-0.02 - 0.21)                        | 0.14 (0.10 - 0.17) *                        | 0.04 (-0.07 - 0.15)                                   | -0.09 (-0.22 - 0.04)                                    |
| Other                           | 32.7                          | 38.5    | 5.7                | 0.08 (0.03 - 0.14) *                       | 0.16 (0.13 - 0.20) *                        | 0.08 (0.02 - 0.14) *                                  | -0.05 (-0.14 - 0.04)                                    |
| White                           | 32.4                          | 40.2    | 7.8                | 0.11 (0.06 - 0.17) *                       | 0.24 (0.21 - 0.28) *                        | 0.13 (0.06 - 0.20) *                                  | Reference                                               |
| <b>Rurality</b>                 |                               |         |                    |                                            |                                             |                                                       |                                                         |
| Rural                           | 33.5                          | 42.2    | 8.7                | 0.08 (0.03 - 0.13) *                       | 0.32 (0.26 - 0.38) *                        | 0.24 (0.16 - 0.32) *                                  | 0.16 (0.06 - 0.27) *                                    |
| Urban                           | 30.9                          | 37.8    | 7.0                | 0.12 (0.06 - 0.19) *                       | 0.20 (0.17 - 0.23) *                        | 0.08 (0.01 - 0.15) *                                  | Reference                                               |
| <b>Medical Dual Eligibility</b> |                               |         |                    |                                            |                                             |                                                       |                                                         |
| Non-Dual                        | 33.8                          | 41.8    | 7.9                | 0.10 (0.03 - 0.17) *                       | 0.25 (0.21 - 0.28) *                        | 0.14 (0.07 - 0.22) *                                  | Reference                                               |
| Dual Eligible                   | 26.8                          | 31.9    | 5.0                | 0.14 (0.07 - 0.21) *                       | 0.14 (0.10 - 0.18) *                        | 0.004 (-0.08 - 0.09)                                  | -0.14 (-0.25 - -0.03) *                                 |
| <b>County-Level SDI Score</b>   |                               |         |                    |                                            |                                             |                                                       |                                                         |
| 1-25                            | 32.9                          | 40.7    | 7.8                | 0.15 (0.10 - 0.21) *                       | 0.24 (0.21 - 0.27) *                        | 0.08 (0.02 - 0.15) *                                  | Reference                                               |
| 26-50                           | 32.5                          | 40.4    | 7.9                | 0.13 (0.06 - 0.20) *                       | 0.25 (0.21 - 0.29) *                        | 0.12 (0.05 - 0.19) *                                  | 0.03 (-0.07 - 0.13)                                     |
| 51-75                           | 31.3                          | 39.4    | 8.1                | 0.11 (0.05 - 0.17) *                       | 0.24 (0.20 - 0.27) *                        | 0.13 (0.06 - 0.19) *                                  | 0.04 (-0.05 - 0.14)                                     |
| 76-100                          | 29.0                          | 33.7    | 4.7                | 0.04 (-0.02 - 0.10)                        | 0.16 (0.13 - 0.19) *                        | 0.11 (0.05 - 0.18) *                                  | 0.03 (-0.07 - 0.12)                                     |

**eFigure 1. Trends in 30-Day Post-Discharge Follow Up, 2010-2019**

**A) Primary Care**

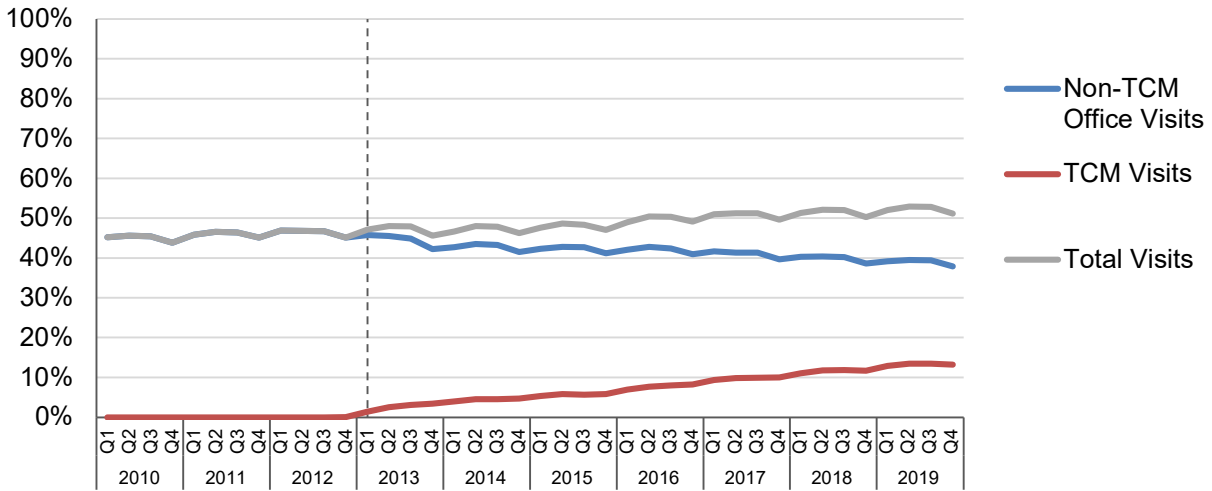

**B) Specialty Care**

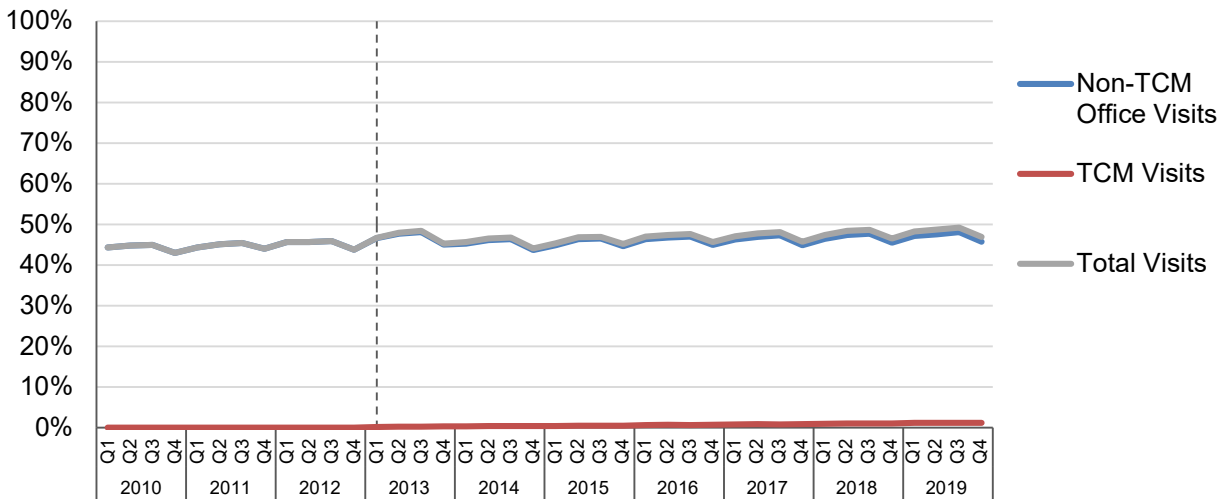

**C) Any Follow-Up**

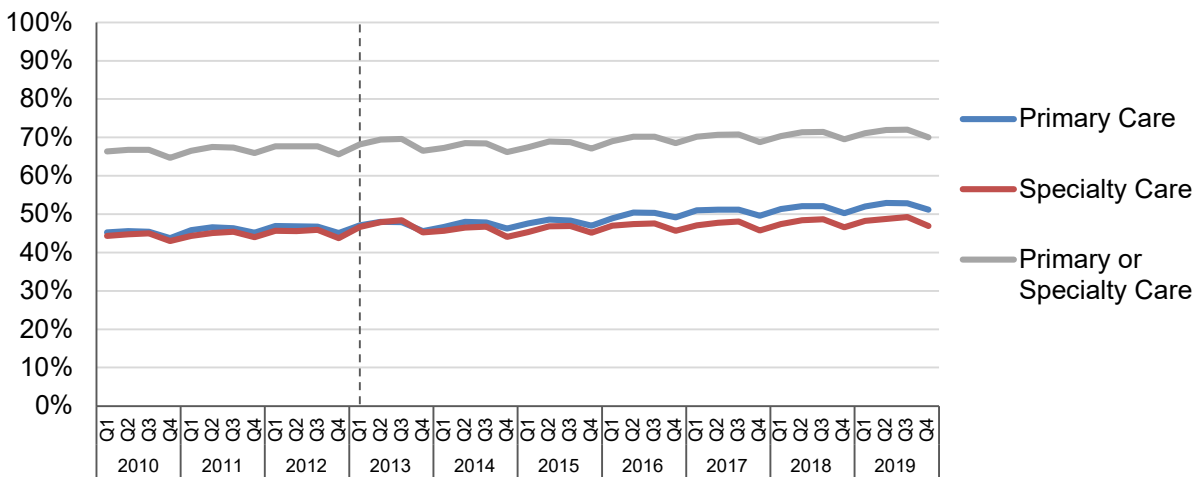

TCM; Transitional Care Management

**Note:** Total refers to receipt of any ambulatory visit, TCM and/or non-TCM visits, within 30 days of discharge.

Office visits refer to patients who received an office visit without a TCM billing code; patients who received both a TCM and non-TCM office visit within 30 days were grouped in the TCM category.

**eFigure 2:** Rates of Transitional Care Management Visits in 2019, by Demographics

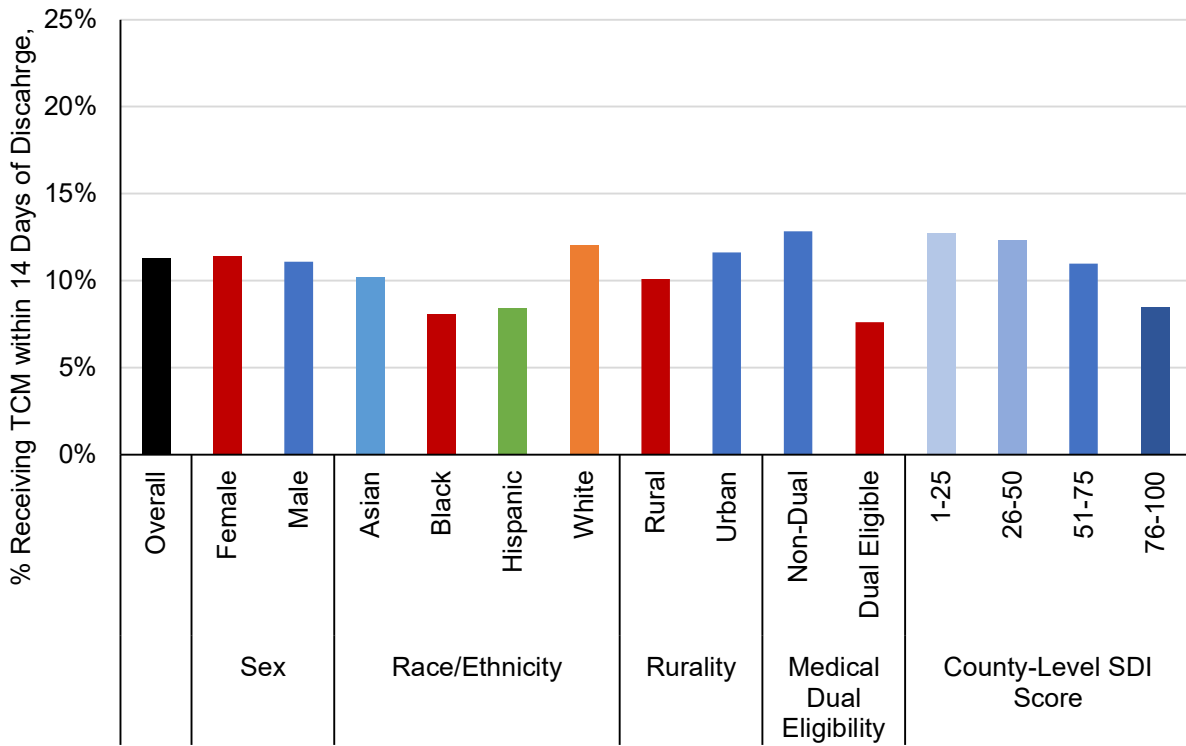

**eFigure 3.** Trends in Timely Post-Discharge Follow Up, 2010-2019, by ACO Attribution

A) Primary Care

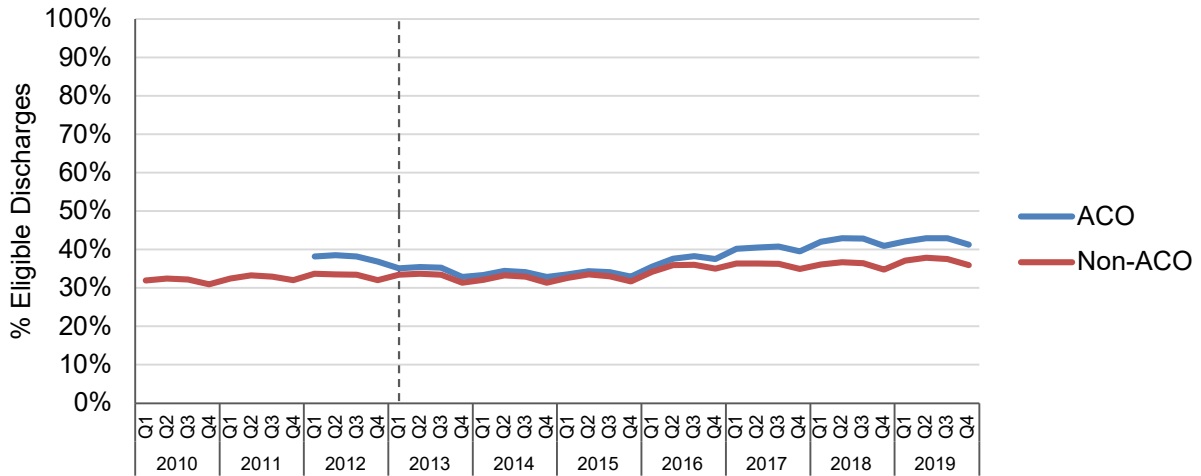

B) Specialty Care

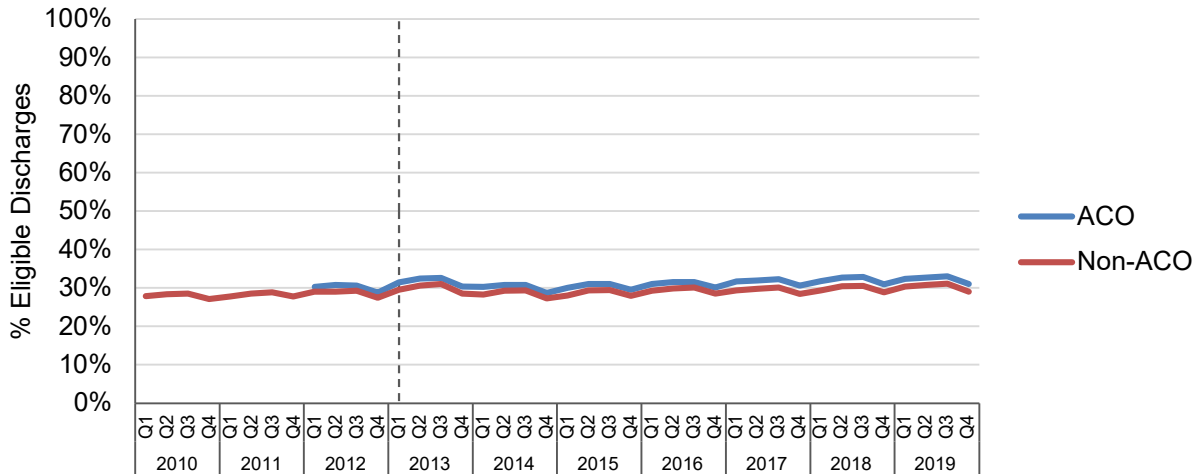

C) Transitional Care Management

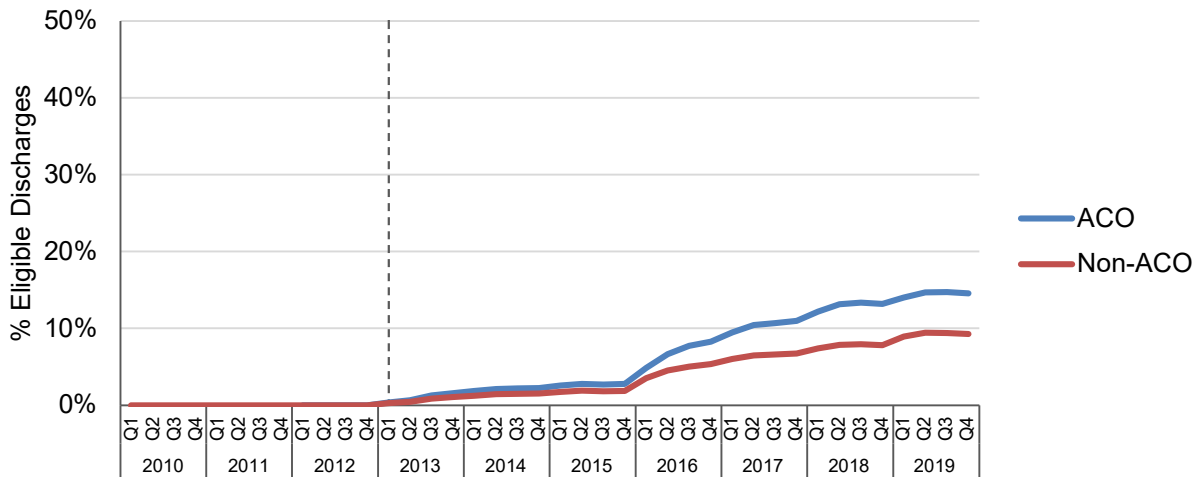

**Note:** Primary care and specialist visits refer to receipt of any ambulatory visit, TCM and/or non-TCM office visits, within 14 days of discharge.



**eFigure 4.** Trends in Timely Post-Discharge Follow Up, 2010-2019, by Recent Primary Care

**A) Primary Care**

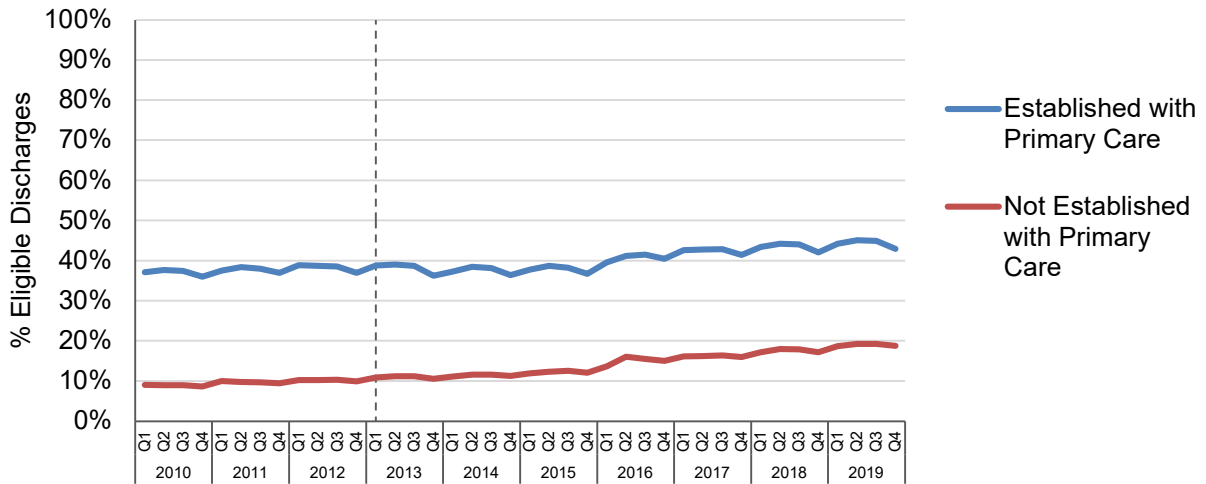

**B) Specialty Care**

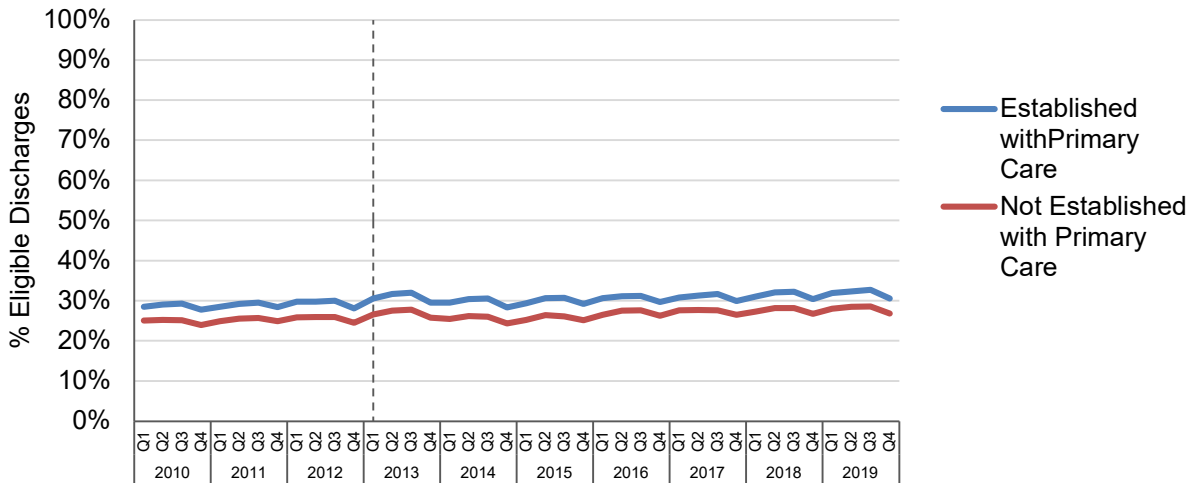

**C) Transitional Care Management**

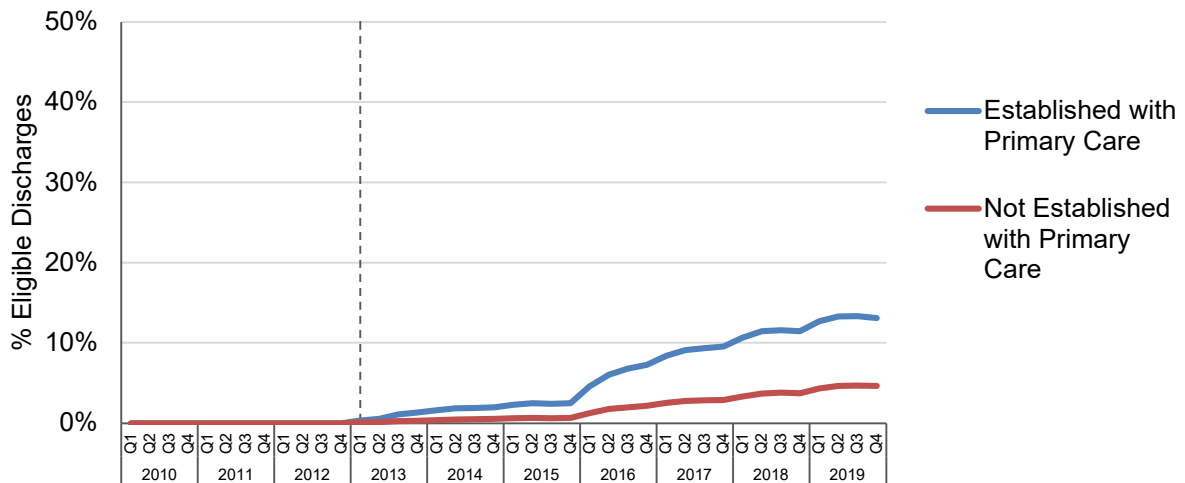

**Note:** Established PCP refers to having any primary care visit in the prior year. Primary care and specialist visits refer to receipt of any ambulatory visit, TCM and/or non-TCM office visits, within 14 days of discharge.
