# Supplementary material for: Medicare Transitional Care Management Program and Changes in Timely Postdischarge Follow-Up
Source: PubMed Central journal article supplement (PMC11065163; doi:10.1001/jamahealthforum.2024.0417), 2024-04-12
Supplement: jamahealthforum-e240417-s002.pdf [file jamahealthforum-e240417-s002.pdf]

## **Data Sharing Statement**

Anderson. Medicare Transitional Care Management Program and Changes in Timely Postdischarge Follow-Up. *JAMA Health Forum*. Published April 12, 2024.  
doi:10.1001/jamahealthforum.2024.0417

### **Data**

**Data available:** No

### **Additional Information**

**Explanation for why data not available:** Medicare DUA agreement
